# Supplementary material
Source: publisher figshare collection journal article supplement (https://frontiersin.figshare.com/ndownloader/files/26631923)
Supplement: Supplementary file [file 26631923]

**Supplementary Table S2** | Table detailing KOs used for the prediction of targeted metabolic functions.

| Function                                           | KEGG Pathway | KEGG Enzyme    | KEGG Genes         | KEGG Orthologs (KO) |
|----------------------------------------------------|--------------|----------------|--------------------|---------------------|
| Carbon fixation by prokaryotic organisms           | map00720     | -              | -                  | -                   |
| Carbon fixation by photosynthetic organisms        | map00710     | -              | -                  | -                   |
| Photosynthesis                                     | map00195     | -              | -                  | -                   |
| Denitrification                                    | -            | EC :1.7.99.4   | <i>narGHI</i>      | K0370-74            |
|                                                    |              | EC :1.9.6.1    | <i>napAB</i>       | K02567-68           |
|                                                    |              | EC :1.7.2.1    | <i>nirKS</i>       | K15864/K00368       |
|                                                    |              | EC :1.7.2.5    | <i>norBC</i>       | K04561/K02305       |
|                                                    |              | EC :1.7.2.4    | <i>nosZ</i>        | K00376              |
| Nitrification                                      | -            | EC :1.4.99.39  | <i>amoCAB</i>      | K10944-46           |
|                                                    |              | EC :1.7.3.4    | <i>hao</i>         | K10535              |
| Nitrogen fixation                                  | -            | EC :1.18.6.1   | <i>nifDKH</i>      | K00531              |
|                                                    |              |                | <i>anfG</i>        | K02586              |
|                                                    |              |                |                    | K02588              |
|                                                    |              |                |                    | K02591              |
| Phosphate utilization (organic)                    | -            | EC:3.6.1.11    | <i>ppx</i>         | K01524              |
| Sulfate reduction (dissimilatory and assimilatory) | -            | EC:2.7.7.4     | <i>sat</i>         | K00958              |
|                                                    |              | EC:2.7.7.4     | <i>cysND</i>       | K00956-57           |
|                                                    |              | EC:2.7.1.25    | <i>PAPSS</i>       |                     |
|                                                    |              | EC:2.7.1.25    | <i>cysC</i>        | K00860              |
|                                                    |              | EC:1.8.4.8     | <i>cysH</i>        | K00390              |
|                                                    |              | EC :1.8.1.2    | <i>cysπ</i>        | K00380-81           |
|                                                    |              | EC :1.8.7.1    | <i>sir</i>         | K00392              |
|                                                    |              | EC :1.8.99.2   | <i>aprAB</i>       | K00394-95           |
|                                                    |              | EC :1.8.99.3   | <i>dsrAB</i>       | K11180-81           |
| Methanogenesis                                     | -            | EC :1.2.99.5   | <i>fwdABCDEFGH</i> | K00200-05           |
|                                                    |              | EC :2.3.1.101  | <i>ptr</i>         | K00672              |
|                                                    |              | EC :1.5.99.9   | <i>mta</i>         | K00319              |
|                                                    |              | EC :1.2.98.2   | <i>hmd</i>         | K13942              |
|                                                    |              | EC :2.1.1.86   | <i>mtrABCDEFGH</i> | K00577-84           |
|                                                    |              | EC :2.8.4.1    | <i>mcrABG</i>      | K00399/K00401-02    |
|                                                    |              | EC :1.8.98.1   | <i>hdrA2B2C2</i>   | K03388-90           |
|                                                    |              | EC :1.8.98.1   | <i>hdrD</i>        | K08264              |
| Methane oxidation                                  | -            | EC :1.1.2.7    | <i>Mdh12</i>       | K14028-29           |
|                                                    |              | EC :1.14.13.25 | <i>mmoXYZBCD</i>   | K16157-61           |
|                                                    |              | EC :1.1.2.7    | <i>mxgJGACKLD</i>  | K16254-60           |
